# Supplementary material for: Identification of LINE retrotransposons and long non-coding RNAs expressed in the octopus brain
Source: PubMed Central journal article supplement (PMC9115989; doi:10.1186/s12915-022-01303-5), 2022-05-18
Supplement: 12915_2022_1303_MOESM1_ESM.pdf [file 12915_2022_1303_MOESM1_ESM.pdf]

## SUPPLEMENTAL FIGURES AND TABLES

### Identification of LINE retrotransposons and long non-coding RNAs expressed in the octopus brain

Giuseppe Petrosino<sup>1,\*</sup>, Giovanna Ponte<sup>1,\*</sup>, Massimiliano Volpe<sup>1,\*</sup>, Ilaria Zarrella<sup>1</sup>, Federico Ansaloni<sup>8,2</sup>, Concetta Langella<sup>1</sup>, Giulia Di Cristina<sup>1</sup>, Sara Finaurini<sup>2</sup>, Monia T. Russo<sup>3</sup>, Swaraj Basu<sup>1</sup>, Francesco Musacchia<sup>1</sup>, Filomena Ristoratore<sup>1</sup>, Dinko Pavlinic<sup>4</sup>, Vladimir Benes<sup>4</sup>, Maria I. Ferrante<sup>3</sup>, Caroline Albertin<sup>5</sup>, Oleg Simakov<sup>6,7</sup>, Stefano Gustincich<sup>8,2</sup>, Graziano Fiorito<sup>1,#</sup>, Remo Sanges<sup>1,2,8,#</sup>

<sup>1</sup> Department of Biology and Evolution of Marine Organisms, Stazione Zoologica Anton Dohrn, Villa Comunale, 80121 Napoli (SZN), Italy.

<sup>2</sup> Neurobiology Sector, Scuola Internazionale Superiore di Studi Avanzati (SISSA), Via Bonomea 265, 34136 Trieste, Italy.

<sup>3</sup> Department of Integrative Marine Ecology, Stazione Zoologica Anton Dohrn, Villa Comunale, 80121 Napoli (SZN), Italy.

<sup>4</sup> Scientific Core Facilities & Technologies, GeneCore, European Molecular Biology Laboratory (EMBL), Meyerhofstrasse 1, 69117 Heidelberg, Germany.

<sup>5</sup> Marine Biological Laboratory (MBL), Woods Hole, Massachusetts, USA.

<sup>6</sup> Okinawa Institute of Science and Technology Graduate University, Onna, Okinawa 9040495, Japan.

<sup>7</sup> Department of Molecular Evolution and Development, Wien University, Althanstraße 14 (UZA I), 1090 Wien, Austria.

<sup>8</sup> Central RNA Laboratory, Istituto Italiano di Tecnologia (IIT), Via Enrico Melen 83, 16152 Genova, Italy.

\* These authors contributed equally to this work

# corresponding authors:

Remo Sanges, e-mail: [remo.sanges@gmail.com](mailto:remo.sanges@gmail.com)

Graziano Fiorito, e-mail: [graziano.fiorito@szn.it](mailto:graziano.fiorito@szn.it)

**Table S1:** *Octopus vulgaris* samples utilized for sequencing. Brain: supra-oesophageal (SEM) and sub-oesophageal (SUB) masses, and optic lobe (OL); arm: only anterior second left arm (ARM).

| <b>Animal</b> | <b>Sex</b> | <b>Weight</b> | <b>Part</b>            | <b>Partname</b> | <b>Samplename</b> |
|---------------|------------|---------------|------------------------|-----------------|-------------------|
| 13/01         | F          | 296           | supra-oesophageal mass | SEM             | IZ10              |
| 13/01         | F          | 296           | sub-oesophageal mass   | SUB             | IZ11              |
| 13/01         | F          | 296           | optic lobe             | OL              | IZ12              |
| 13/01         | F          | 296           | anterior arm           | ARM             | IZ13              |
| 13/02         | M          | 336           | supra-oesophageal mass | SEM             | IZ15              |
| 13/02         | M          | 336           | sub-oesophageal mass   | SUB             | IZ16              |
| 13/02         | M          | 336           | optic lobe             | OL              | IZ17              |
| 13/02         | M          | 336           | anterior arm           | ARM             | IZ18              |
| 13/03         | M          | 288           | supra-oesophageal mass | SEM             | IZ20              |
| 13/03         | M          | 288           | sub-oesophageal mass   | SUB             | IZ21              |
| 13/03         | M          | 288           | optic lobe             | OL              | IZ22              |
| 13/03         | M          | 288           | anterior arm           | ARM             | IZ23              |

**Table S2:** Counts of the assembled *Octopus vulgaris* and *O. bimaculoides* transcriptomes.

|                                    | <i>O. vulgaris</i> | <i>O. bimaculoides</i> |
|------------------------------------|--------------------|------------------------|
| Assembled and filtered transcripts | 64477              | 92820                  |
| Total bases                        | 84399088           | 102485827              |
| GC content (%)                     | 37.9               | 37                     |
| Contig N50                         | 2087               | 1573                   |
| Median transcript length (bp)      | 795                | 744                    |
| Average transcript length (bp)     | 1308               | 1104                   |
| Minimum length (bp)                | 201                | 201                    |
| Maximum length (bp)                | 20031              | 32440                  |
| 248 CEGs Complete (%)              | 97.20              | 98.79                  |
| 248 CEGs Complete + Partial (%)    | 98.4               | 100                    |

**Table S3:** Counts of the repeats composition for the assembled *Octopus vulgaris* transcriptome.

|                                   | <b>Nucleotides</b> | <b>Percentage</b> | <b>Transcripts</b> | <b>Percentage</b> |
|-----------------------------------|--------------------|-------------------|--------------------|-------------------|
| <b>Bases Masked</b>               | 6584938            | 7.8               | 46944              | 72.8              |
| <b>Retroelements</b>              | 2102784            | 2.5               | 16926              | 26.2              |
| <b>DNA transposons</b>            | 1501995            | 1.8               | 11913              | 18.5              |
| <b>Unclassified</b>               | 169576             | 0.2               | 250                | 0.4               |
| <b>Total interspersed repeats</b> | 3774355            | 4.5               | 22915              | 35.5              |
| <b>Satellites</b>                 | 150431             | 0.2               | 1326               | 2.1               |
| <b>Simple repeats</b>             | 2368596            | 2.8               | 34833              | 54                |
| <b>Low complexity</b>             | 470441             | 0.6               | 7704               | 11.9              |

**Table S4:** LINEs used for phylogenetic analysis (see also: Ohshima and Okada<sup>36</sup> and Jurka et al.<sup>71</sup>).

| Clade     | Name                           | Species                        | Sequence ID                  |
|-----------|--------------------------------|--------------------------------|------------------------------|
| CRE       | SLACS                          | <i>Trypanosoma brucei</i>      | CAA34931                     |
|           | CZAR                           | <i>Trypanosoma cruzi</i>       | AAA30239                     |
|           | CRE1                           | <i>Crithidia fasciculata</i>   | AAA75435                     |
|           | CRE2                           | <i>Crithidia fasciculata</i>   | AAB40036                     |
| Genie/Gil | GilM                           | <i>Giardia intestinalis</i>    | AAI47180                     |
| R4        | R4A1                           | <i>Ascaris lumbricoides</i>    | AAA97394                     |
| R1        | R1Dm                           | <i>Drosophila melanogaster</i> | CAA36227                     |
|           | R1                             | <i>Bradysia coprophila</i>     | AAA29813                     |
|           | RT1                            | <i>Anopheles gambiae</i>       | AAA29363                     |
|           | RT2                            | <i>Anopheles gambiae</i>       | AAA29365                     |
|           | R1Bm                           | <i>Bombyx mori</i>             | AAC13649                     |
|           | TRAS1                          | <i>Bombyx mori</i>             | BAA07467                     |
|           | SART1                          | <i>Bombyx mori</i>             | BAA19776                     |
|           | LOA                            | LOA                            | <i>Drosophila silvestris</i> |
| LOA       | BAGGINS1                       | <i>Drosophila melanogaster</i> | Repbase                      |
|           | Bilbo                          | <i>Drosophila subobscura</i>   | AAB92389                     |
|           | Lian-Aa1                       | <i>Aedes aegypti</i>           | AAB65093                     |
| Tad1      | Tad1                           | <i>Neurospora crassa</i>       | AAA21781                     |
|           | MgL                            | <i>Magnaporthe grisea</i>      | AAB71689                     |
|           | CgT1                           | <i>Glomerella cingulata</i>    | AAA85636                     |
| Jockey    | BMC1                           | <i>Bombyx mori</i>             | BAB21761                     |
|           | amy                            | <i>Bombyx mori</i>             | AAA17752                     |
|           | Juan-A                         | <i>Aedes aegypti</i>           | AAA29354                     |
|           | Juan-C                         | <i>Culex pipiens</i>           | AAA28291                     |
|           | NLR1Cth                        | <i>Chironomus thummi</i>       | AAB26437                     |
|           | Doc6                           | <i>Drosophila melanogaster</i> | Repbase                      |
|           | G5                             | <i>Drosophila melanogaster</i> | Repbase                      |
|           | G5A                            | <i>Drosophila melanogaster</i> | Repbase                      |
|           | Jockey                         | <i>Drosophila melanogaster</i> | AAA28675                     |
|           | Doc                            | <i>Drosophila melanogaster</i> | CAA35587                     |
|           | Fw                             | <i>Drosophila melanogaster</i> | AAA28508                     |
|           | Fw2                            | <i>Drosophila melanogaster</i> | Repbase                      |
|           | G4                             | <i>Drosophila melanogaster</i> | Repbase                      |
|           | Helena                         | <i>Drosophila yakuba</i>       | AAC24972                     |
|           | BS                             | <i>Drosophila melanogaster</i> | Repbase                      |
| BS3       | <i>Drosophila melanogaster</i> | Repbase                        |                              |
| TART-B1   | <i>Drosophila melanogaster</i> | AAC46494                       |                              |
| I         | I-1_DR                         | <i>Danio rerio</i>             | Repbase                      |
|           | IVK                            | <i>Drosophila melanogaster</i> | Repbase                      |
|           | I                              | <i>Drosophila melanogaster</i> | AAA70222                     |
|           | ingi                           | <i>Trypanosoma brucei</i>      | CAA29181                     |
|           | L1Te                           | <i>Trypanosoma cruzi</i>       | CAB41693                     |
| Rex1      | Rex1-1_DR                      | <i>Danio rerio</i>             | Repbase                      |
| CR1       | Sam3                           | <i>Caenorhabditis elegans</i>  | AAA93347                     |
|           | Sam1                           | <i>Caenorhabditis elegans</i>  | AAA21080                     |
|           | Q                              | <i>Anopheles gambiae</i>       | AAA53489                     |
|           | CR1-3_AG                       | <i>Anopheles gambiae</i>       | Repbase                      |
|           | CR1-5_AG                       | <i>Anopheles gambiae</i>       | Repbase                      |
|           | T1                             | <i>Anopheles gambiae</i>       | AAA29367                     |
|           | CR1-2_AG                       | <i>Anopheles gambiae</i>       | Repbase                      |
|           | CR1-4_AG                       | <i>Anopheles gambiae</i>       | Repbase                      |
|           | DMCR1A                         | <i>Drosophila melanogaster</i> | Repbase                      |
|           | CR1                            | <i>Gallus gallus</i>           | AAC60281                     |
|           | PsCR1                          | <i>Platymys spixii</i>         | BAA88337                     |
|           | L3                             | <i>Homo sapiens</i>            | Repbase                      |
|           | SR1                            | <i>Schistosoma mansoni</i>     | AAC06263                     |
|           | L2                             | UnaL2                          | <i>Anguilla japonica</i>     |
| Maui      |                                | <i>Takifugu rubripes</i>       | AAD19348                     |
| CR1-3_DR  |                                | <i>Danio rerio</i>             | Repbase                      |
| CR1-1_AG  |                                | <i>Anopheles gambiae</i>       | Repbase                      |
| R2        | R2Bm                           | <i>Bombyx mori</i>             | AAB59214                     |

| Clade  | Name      | Species                         | Sequence ID |
|--------|-----------|---------------------------------|-------------|
|        | R2Nv      | <i>Nasonia vitripennis</i>      | AAC34927    |
|        | R2Fa      | <i>Forficula auricularia</i>    | AAC34906    |
|        | R2Dm      | <i>Drosophila melanogaster</i>  | CAA36225    |
|        | R2Am      | <i>Anurida maritima</i>         | AAC34903    |
|        | R2Lp      | <i>Limulus polyphemus</i>       | AAC34904    |
| NeSL-1 | NeSL-1    | <i>Caenorhabditis elegans</i>   | CAB04870    |
| RTE    | BovB      | <i>Bos taurus</i>               | Repbase     |
|        | BovB_VA   | <i>Vipera ammodytes</i>         | Repbase     |
|        | RTE-1     | <i>Caenorhabditis elegans</i>   | AAA50641    |
|        | RTE-2     | <i>Caenorhabditis elegans</i>   | AAB00700    |
|        | RTE-1_AG  | <i>Anopheles gambiae</i>        | Repbase     |
|        | JAM1      | <i>Aedes aegypti</i>            | Repbase     |
|        | Rex3      | <i>Xiphophorus maculatus</i>    | Repbase     |
|        | SR2       | <i>Schistosoma mansoni</i>      | Repbase     |
|        | RTE-3_AG  | <i>Anopheles gambiae</i>        | Repbase     |
|        | RTE-2_CPB | <i>Chrysemys picta bellii</i>   | Repbase     |
|        | RTE-4_AMi | <i>Crocodylidae</i>             | Repbase     |
|        | RTE-5_AMi | <i>Crocodylidae</i>             | Repbase     |
|        | RTE-6_AMi | <i>Crocodylidae</i>             | Repbase     |
|        | RTE-7_AMi | <i>Crocodylidae</i>             | Repbase     |
|        | RTE-8_AMi | <i>Crocodylidae</i>             | Repbase     |
| L1     | L1Hs      | <i>Homo sapiens</i>             | AAA51622    |
|        | L1Md      | <i>Mus musculus</i>             | AAA66024    |
|        | L1-1_DR   | <i>Danio rerio</i>              | Repbase     |
|        | L1-10_DR  | <i>Danio rerio</i>              | Repbase     |
|        | L1-6_DR   | <i>Danio rerio</i>              | Repbase     |
|        | L1-8_DR   | <i>Danio rerio</i>              | Repbase     |
|        | L1-3_DR   | <i>Danio rerio</i>              | Repbase     |
|        | L1-5_DR   | <i>Danio rerio</i>              | Repbase     |
|        | L1-2_DR   | <i>Danio rerio</i>              | Repbase     |
|        | L1-4_DR   | <i>Danio rerio</i>              | Repbase     |
|        | DRE       | <i>Dictyostelium discoideum</i> | Repbase     |
|        | ATLINE1_4 | <i>Arabidopsis thaliana</i>     | Repbase     |
|        | ATLINE1_5 | <i>Arabidopsis thaliana</i>     | Repbase     |
|        | Tal1-1    | <i>Arabidopsis thaliana</i>     | AAA75254    |
|        | ATLINE1_6 | <i>Arabidopsis thaliana</i>     | Repbase     |
|        | Cin4      | <i>Zea mays</i>                 | Repbase     |
|        | Tx1       | <i>Xenopus laevis</i>           | AAA49976    |
|        | Zepp      | <i>Chlorella vulgaris</i>       | BAA25763    |

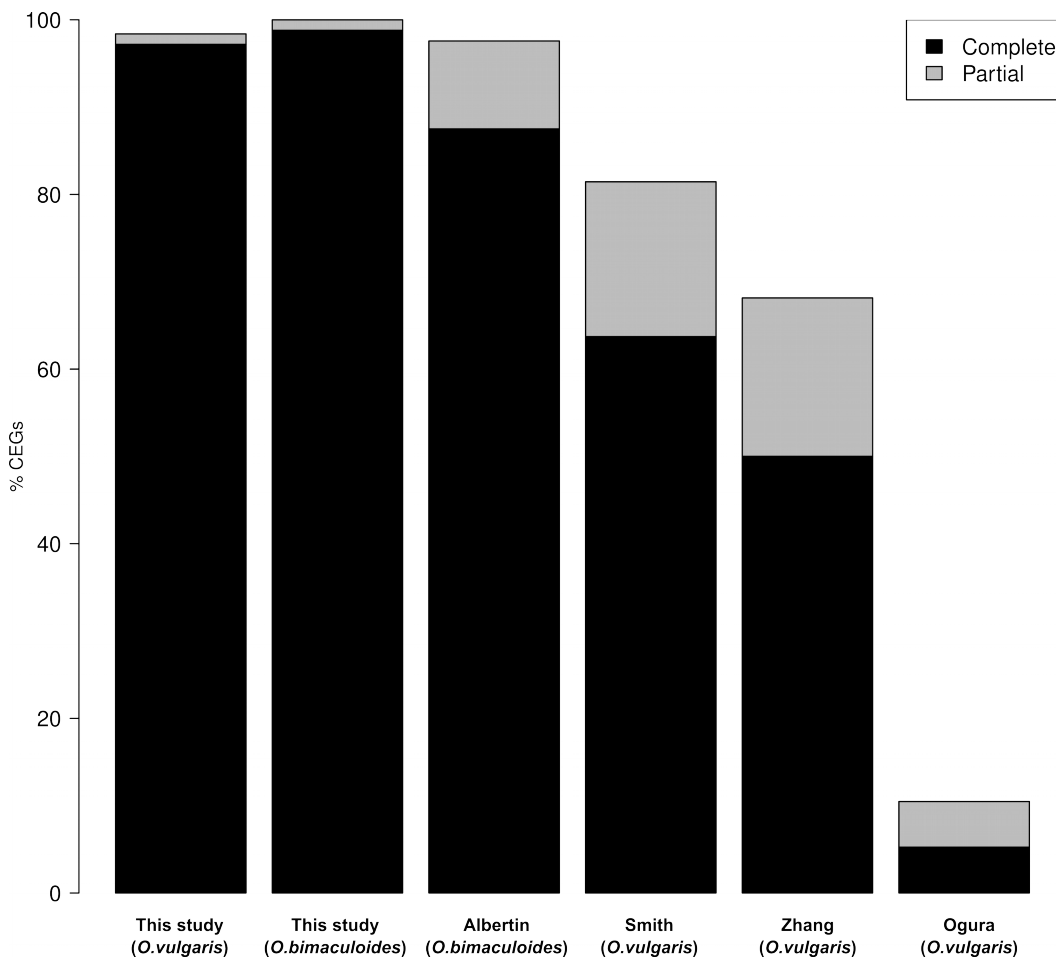

**Figure S1: Completeness of *Octopus* transcriptomes.** Percentages of core eukaryotic genes (CEGs) represented into this and published assemblies of octopus transcriptomes (Albertin et al.<sup>5</sup>; Smith et al.<sup>62</sup>; Zhang et al.<sup>84</sup>; Ogura et al.<sup>85</sup>). The barplots indicate the percentages of CEGs present into every published transcriptome. The portion defined as “complete” identify all those transcripts whose assembled sequence are predicted to be full-length while “partial” indicates the reconstruction of only a fragment of specific CEGs. All the transcriptomes originate from *Octopus vulgaris* with the exception of the transcriptome from Albertin et al.<sup>5</sup> which originate from *Octopus bimaculoides*. Two transcriptomes for *O. bimaculoides* are included here, the original one assembled by Albertin et al.<sup>5</sup> and the same assembled for the aims of this study as described in Methods. The transcriptomes assembled in this work should be considered the most complete available to date for the genus *Octopus*, since they contain the highest percentages of core eukaryotic genes according to CEGMA (98% for *O. vulgaris* and 100% for *O. bimaculoides*).

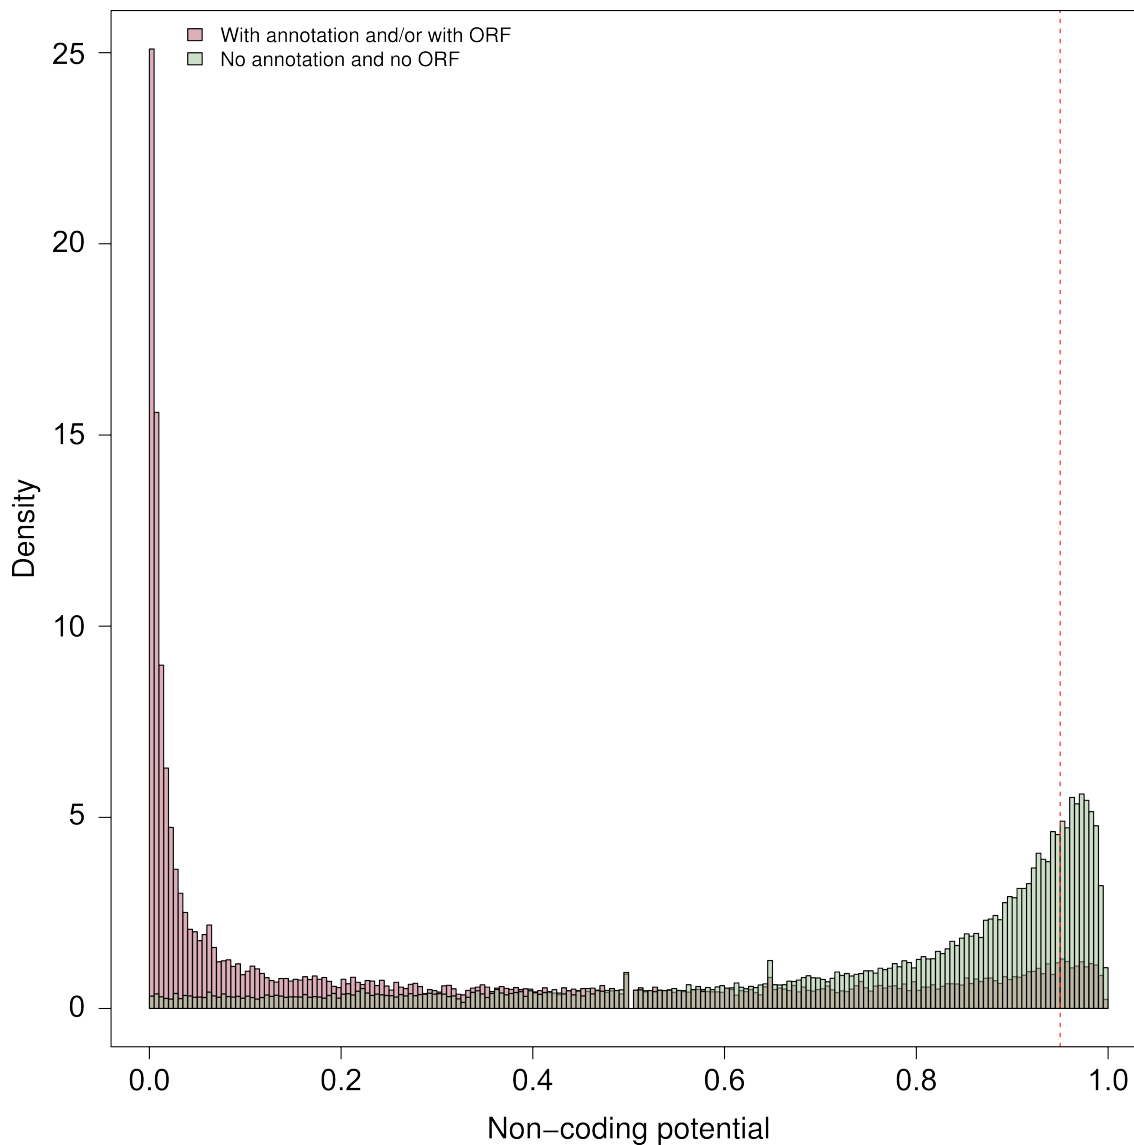

**Figure S2: Stringent classification of lncRNAs.** Non-coding potential score plot as measured by Portrait<sup>57</sup> for the assembled transcripts. The transcriptome has been divided in two groups: the first group of genes showing at least one BLAST match against a protein or a domain or a ribosomal or a small RNA in the annotation analysis and/or an ORF bigger than 100 aa (light red); and the second group of genes not showing any BLAST match and whose longest ORF results shorter than 100 aa (light green). Only transcripts without any match, with an ORF smaller than 100 aa and a non-coding potential bigger than 0.95 have been classified as non-coding. The vertical red dotted line represents the 0.95 non-coding potential cut-off used. The transcripts classified as non-coding are those plotted in the green bars at the right of the vertical red dotted line. According to Portrait recommendations, a non-coding potential score bigger than 0.5 is sufficient to classify a transcript as non-coding. We applied more stringent conditions and despite the combination of multiple parameters and the application of these stringent cutoffs we were still able to discover that a high proportion of transcripts likely represent lncRNAs. Here an underestimation of the true proportion of lncRNAs is possible because the RNAseq was not conducted using a strand specific protocol and therefore there is the possibility that annotation for “coding” has been utilized also for cases of “antisense non-coding” overlapping sense coding regions.



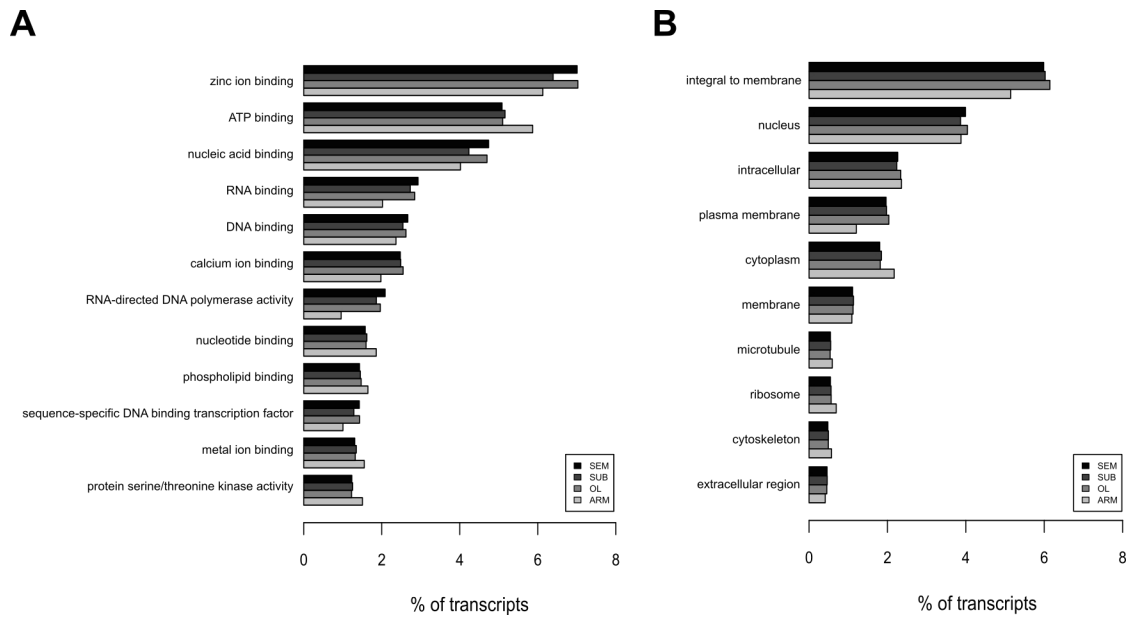

**Figure S3: Most represented GO Molecular Function and Cellular Component classes.** Barplots showing the percentage of top represented GO classes in the transcripts expressed for every tissue considered. The top 10 represented classes for every tissue were selected and the percentage of transcripts expressed associated to the given class is reported. **a**, Molecular function classification confirms the findings obtained with the biological process classification showing a higher rate of RNA-directed DNA polymerase activity in samples deriving from the brain. It is also important to underline that the top represented class in all the parts is the zinc ion binding which confirm the expansion of zinc fingers protein in octopus<sup>5</sup>. **b**, Transcriptome classification according to cellular component division results to be generally similar among the sampled parts. The octopus brain (SEM, SUB, OL) appears to contain a higher number of transcripts whose protein product is localized to the plasma membrane; higher representation of transcripts localized into the cytoplasm are found in ARM.

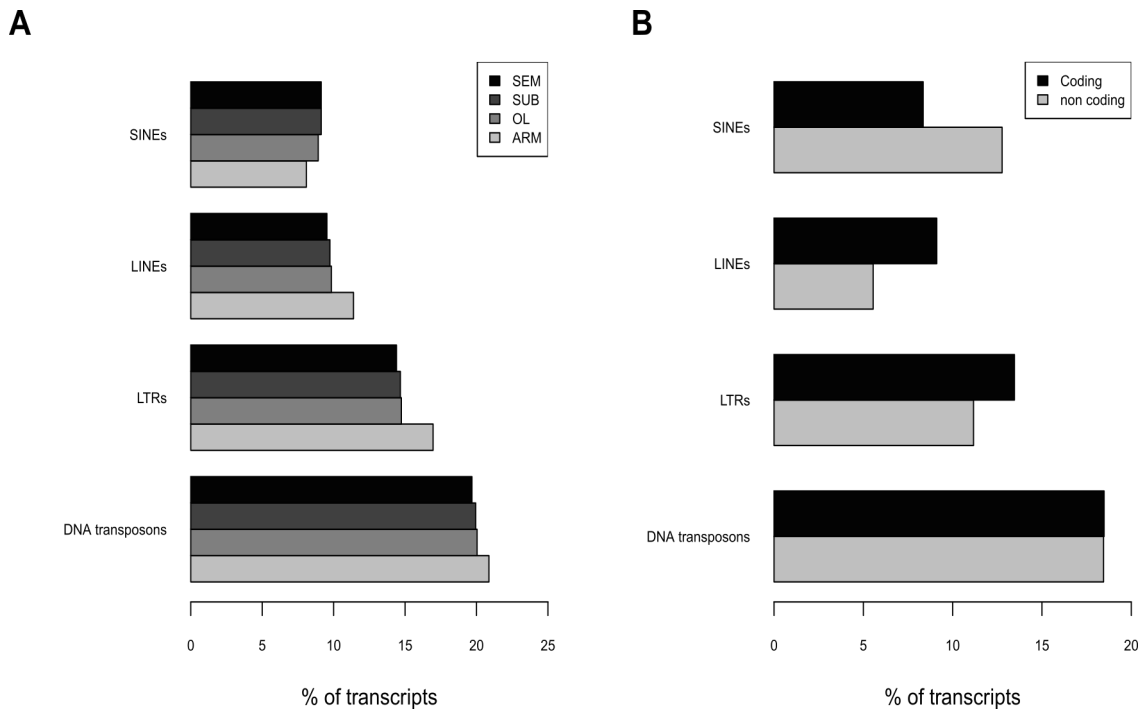

**Figure S4: Percentages of transcripts associated to transposable elements. a**, Barplots representing the percentage of expressed transcripts containing a fragment from a transposable element. SINE elements are most frequently embedded in brain-expressed transcripts while LINES, LTRs and DNA transposons are associated to a higher number of arm-expressed transcripts (brain: SEM, SUB, OL; arm: ARM). **b**, Barplots representing the percentage of expressed coding and non-coding transcripts containing fragments from the different transposons. SINEs are enriched in non-coding transcripts while LINES and LTRs fragments are more frequently embedded in coding transcripts. DNA transposons results to be equally distributed.

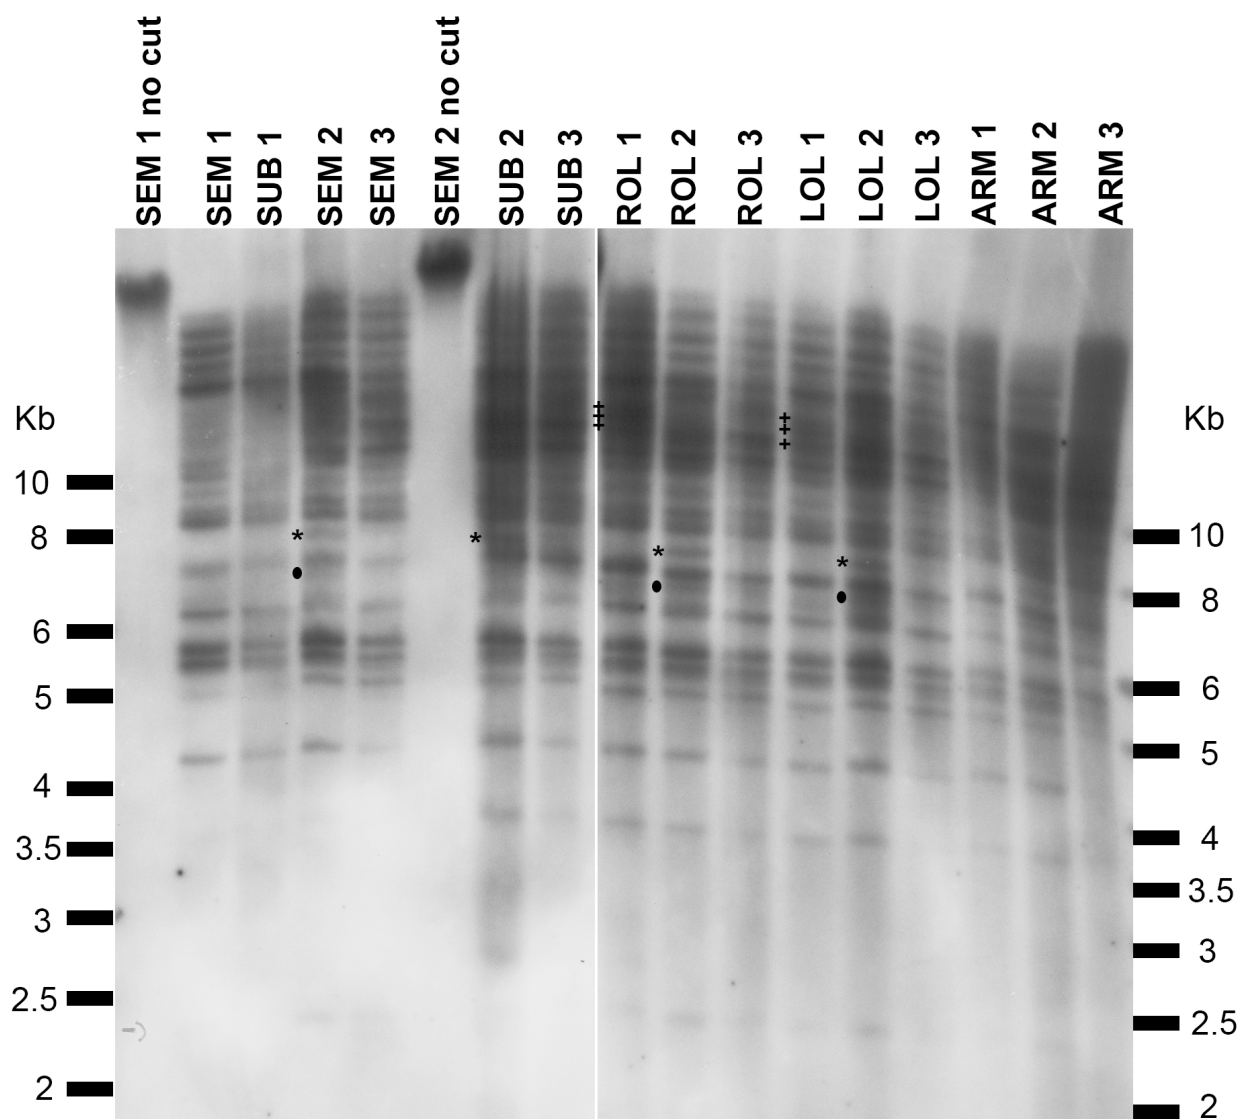

**Figure S5: Southern blot analysis of the *Octopus vulgaris* LINE element.** Genomic DNA extracted from SEM, SUB, OL and ARM of three different animals (#: 1, 2 and 3) were digested by restriction enzyme EcoRI and analyzed by Southern blotting. The fragment indicated by an asterisk (\*) is specific of the individual #2. A plus symbol (+) highlights fragments present in OL and probably ARM of the individual #1, but not in SEM and SUB of the same individual. A dot (•) marks a fragment found in all the tissues of octopus #2 except in the SUB. DNA molecular markers are reported on both sides of the panel.

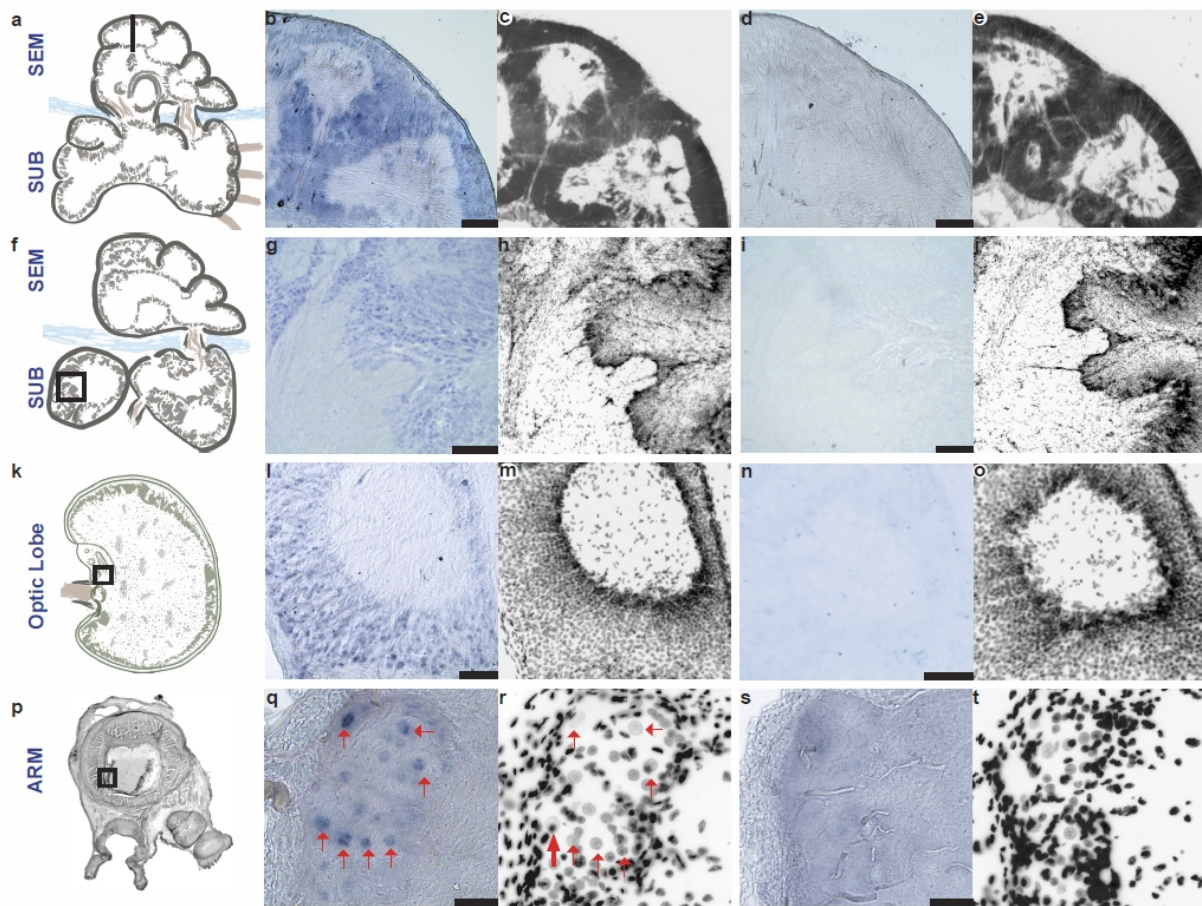

**Figure S6: *In situ* hybridization for LINE in the brain (SEM, SUB and OL) and arm of adult *Octopus vulgaris*, and relative controls.** Schematic diagrams (**a**, **f**, **k**, **p**) of the organization of the octopus brain (SEM and SUB) at the sagittal (**a**) and parasagittal (**f**) planes, of the optic lobe (OL, horizontal section across the midline: **k**), and of the arm (**p**) with the typical distribution of different muscular bundles surrounding the arm nerve cord, in the middle; suckers appear on the ventral side (bottom). The diagram of the octopus arm has been drawn by superimposing tracings (after Milligan staining) of a typical transverse section at the medial length of an arm. **b**, RTE-2\_OV mRNA is detected in numerous cells of the vertical lobe mostly at the cortical layer of each girus. **c**, the corresponding section after DAPI staining where only nuclei appear marked. **d,e**, A similar section at the level of the vertical lobe after staining with sense RTE-2\_OV probe serve as control (the same section is shown also after DAPI staining, **e**). **g-l**, Sections of the SUB at the level of the posterior pedal lobe, with positive cells marked after *in situ* hybridization (**g**) and the corresponding DAPI stained cells (**h**) to reveal the intricate patterns of neurons. Control staining (sense) where no positive cells are revealed are shown in (**i**) again with the same section stained to show nuclei (DAPI, **j**). **l**, An area of the peduncle lobe (OL) at the level of the spine where RTE-2\_OV mRNA appear localized (the same section after DAPI, **m**). **n,o**, A nearby proximate section at the same level (OL) after *in situ* hybridization with sense RTE-2\_OV probe (**n**) and DAPI staining (**o**). **q**, RTE-2\_OV mRNA is seen at the octopus arm only in few large motor neurons (arrows) of the nerve cord; note the corresponding section after hybridization with sense probe (**s**). DAPI staining of the same sections is shown in (**r**, **t**). Sections stained with DAPI are presented to show the cellular populations of the respective areas. Scale bars: 100  $\mu$ m.
